# Supplementary material for: Nanoflower-like N-doped C/CoS2 as high-performance anode materials for Na-ion batteries
Source: Royal Society of Chemistry journal article supplement (doi:10.1039/c8nr06959j), 2018-01-01
Supplement: c8nr06959j1.pdf [file c8nr06959j1.pdf]

## Supporting Information

### **Nanoflower-Like N-Doped C/CoS<sub>2</sub> as High- Performance Anode Materials for Na-Ion Batteries**

Yuelel Pan<sup>a</sup>, Xudong Cheng<sup>a\*</sup>, Lunlun Gong<sup>a</sup>, Long Shi<sup>b</sup>, Heping Zhang<sup>a\*</sup>

<sup>a</sup> State Key Laboratory of Fire Science, University of Science and Technology of China, Hefei, Anhui 230027, PR China

<sup>b</sup> Civil and Infrastructure Engineering Discipline, School of Engineering, RMIT University, Melbourne, VIC 3001, Australia

The file includes Fig. S1-S9.

---

Corresponding author.

\* (X.C.) E-mail address: [chengxd@ustc.edu.cn](mailto:chengxd@ustc.edu.cn)

\* (H.Z.) E-mail address: [zhanghp@ustc.edu.cn](mailto:zhanghp@ustc.edu.cn)

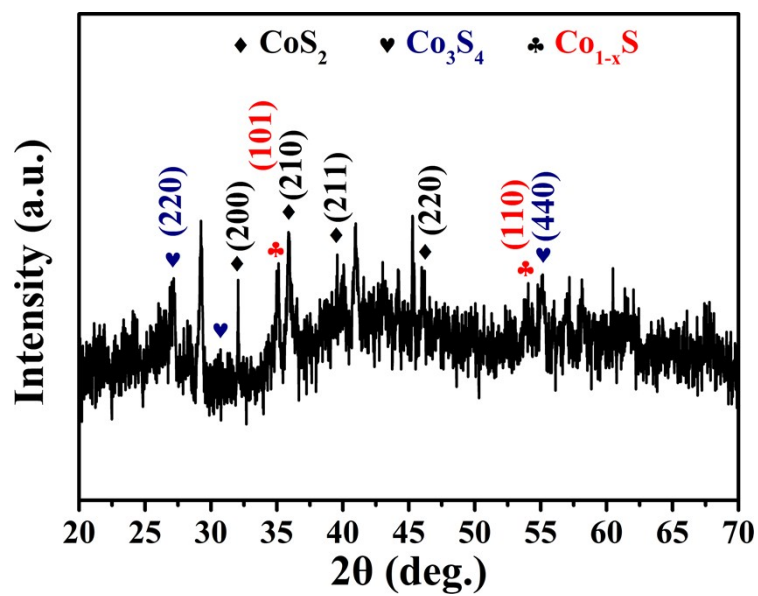

**Fig. S1** XRD pattern of the obtained N-C/CoS<sub>x</sub> hybrid composites after solvothermal process.

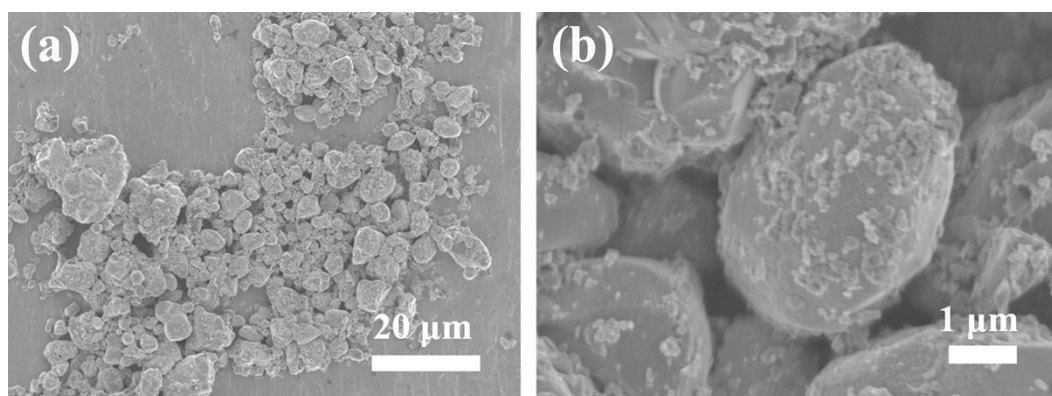

**Fig. S2** SEM images of bare CoS<sub>2</sub>.

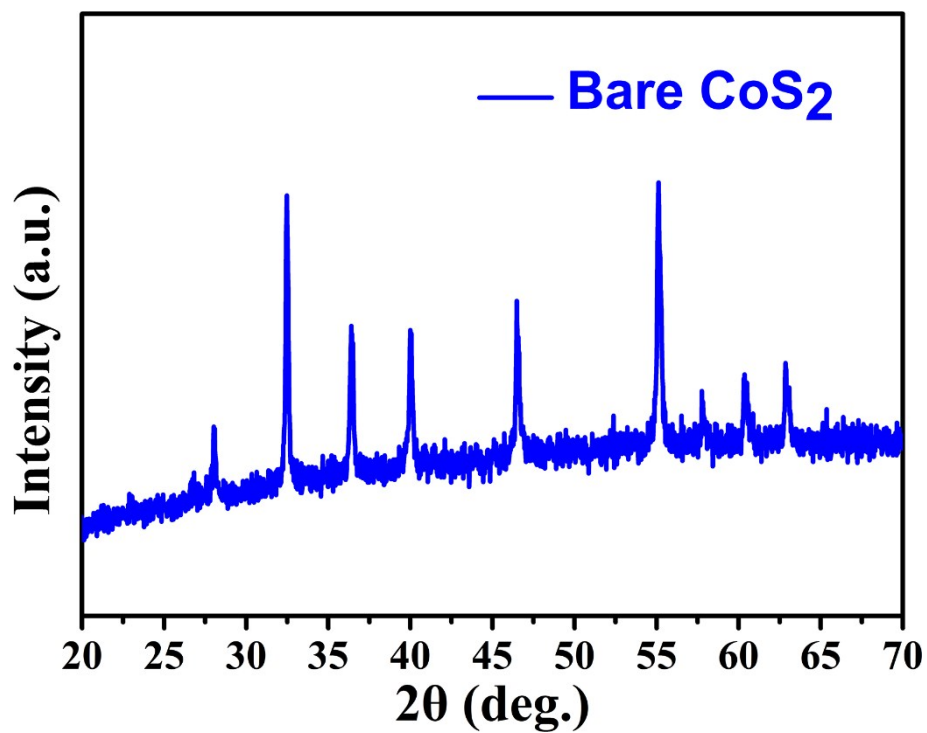

Fig. S3 XRD pattern of the bare  $\text{CoS}_2$ .

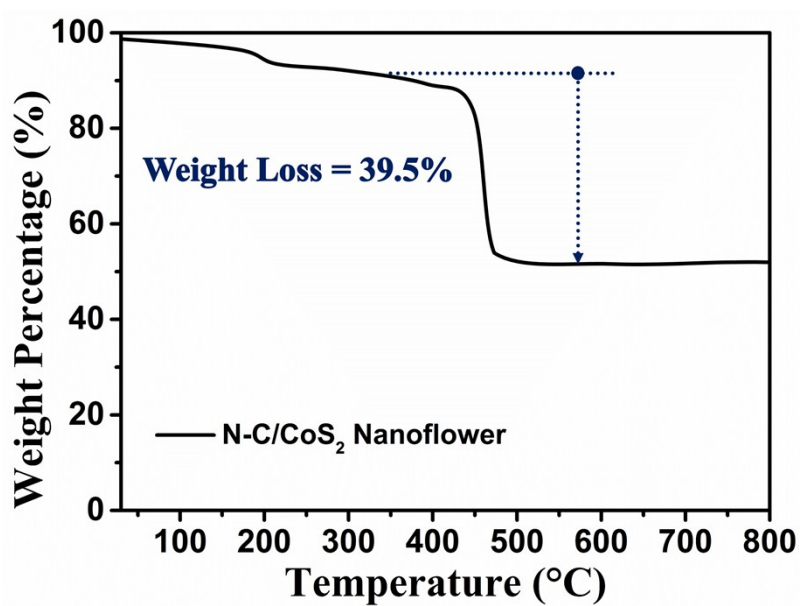

Fig. S4 TG curve of nanoflower-like N-C/ $\text{CoS}_2$  composites to determine the carbon

content in the composites. The carbon mass loss is assigned to the temperature ranging from 400 to 500 °C.

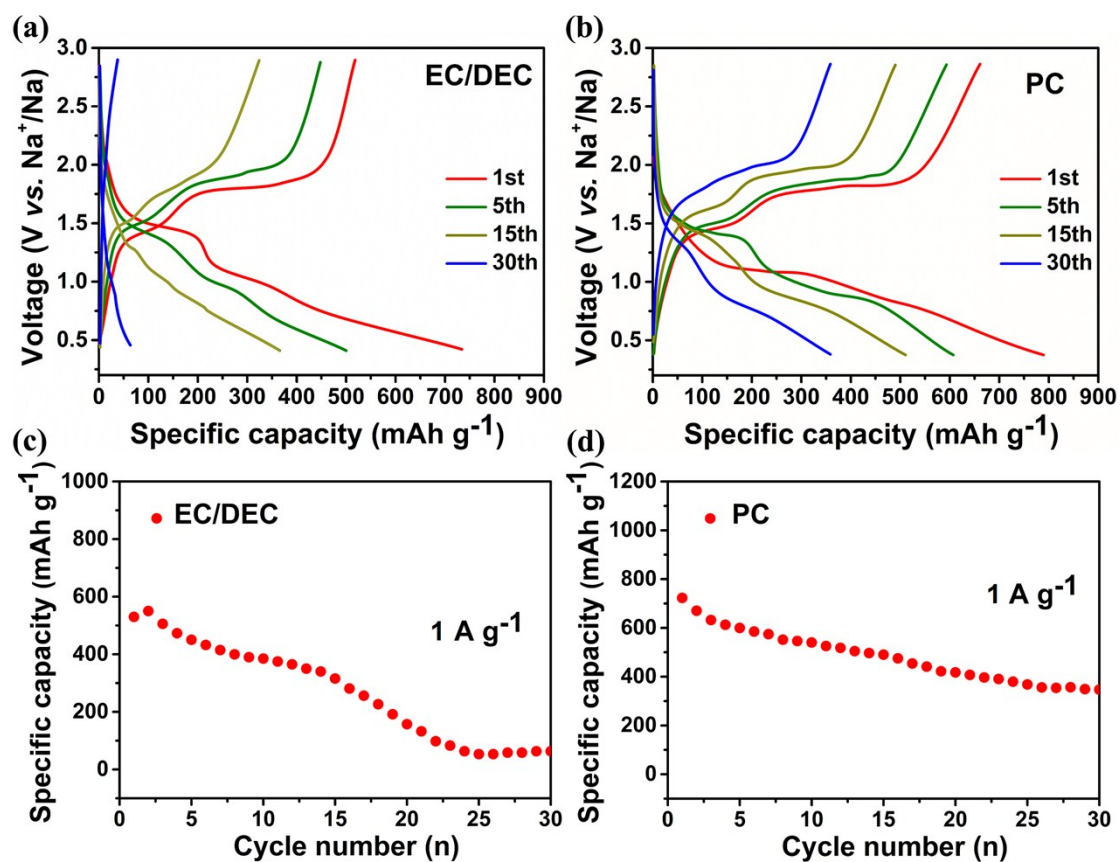

**Fig. S5** Charge-discharge curves of N-C/CoS<sub>2</sub> electrodes using 1 M NaCF<sub>3</sub>SO<sub>3</sub> in (a) EC/DEC, (b) PC at 1 A g<sup>-1</sup> in potential range of 0.4-2.9 V and (c, d) cycling performance in the two different solvents.

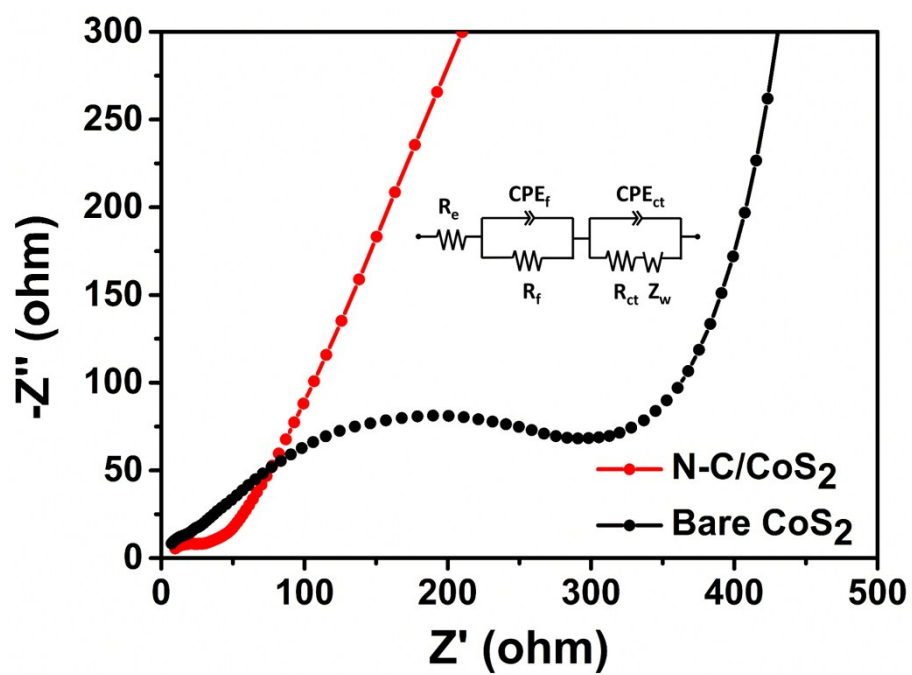

**Fig. S6** Electrochemical impedance spectra of N-C/CoS<sub>2</sub> and bare CoS<sub>2</sub>.

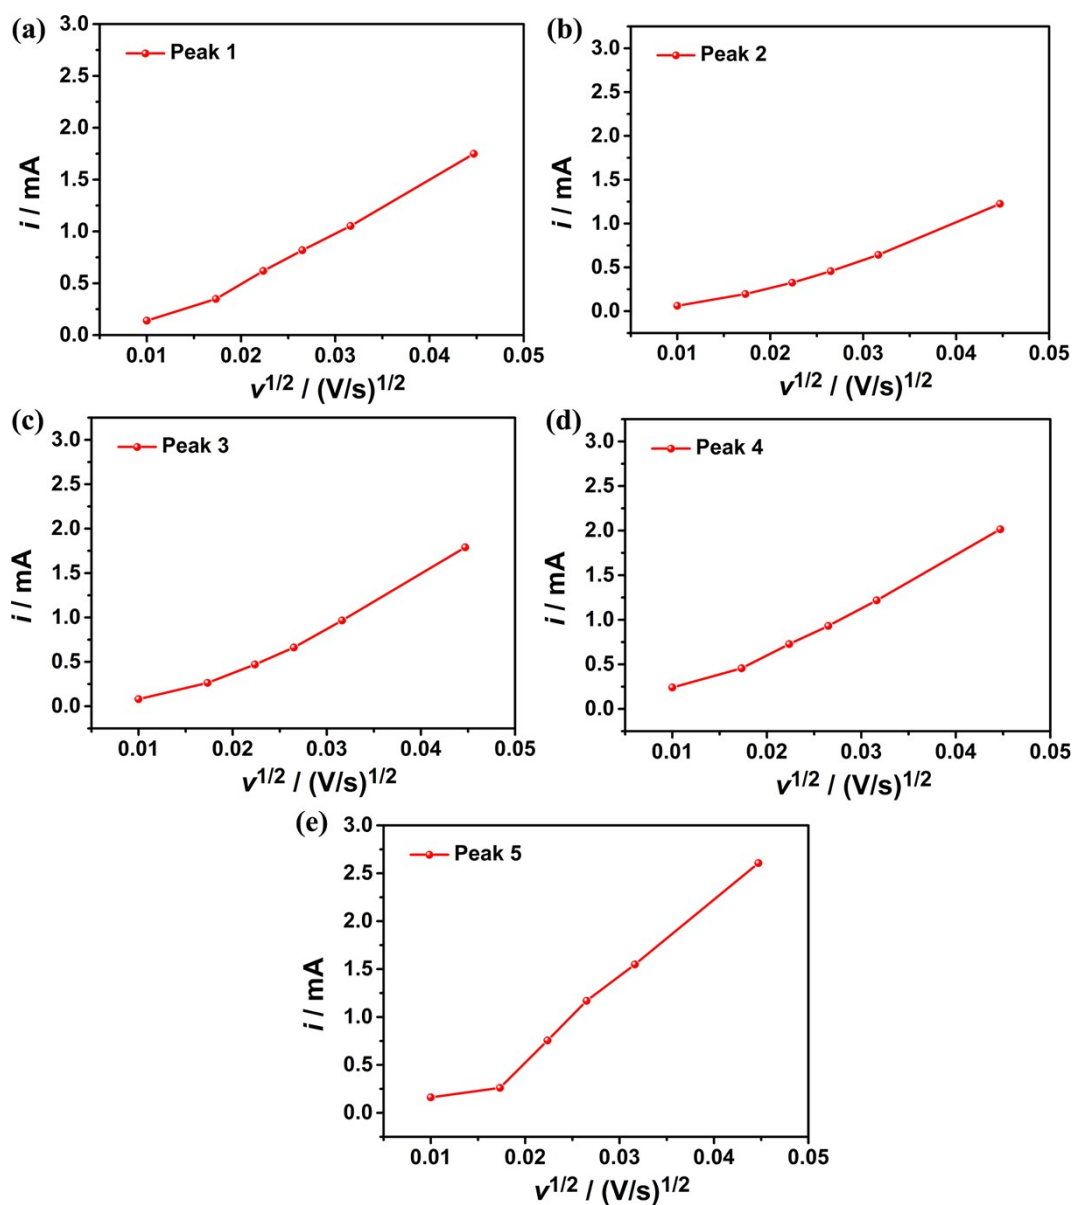

**Fig. S7**  $i$  vs.  $v^{1/2}$  plots at each redox peak of CV curves (peak current  $i$ , scan  $v$ ): Peak 1, Peak 2, Peak 3, Peak 4, Peak 5, respectively.

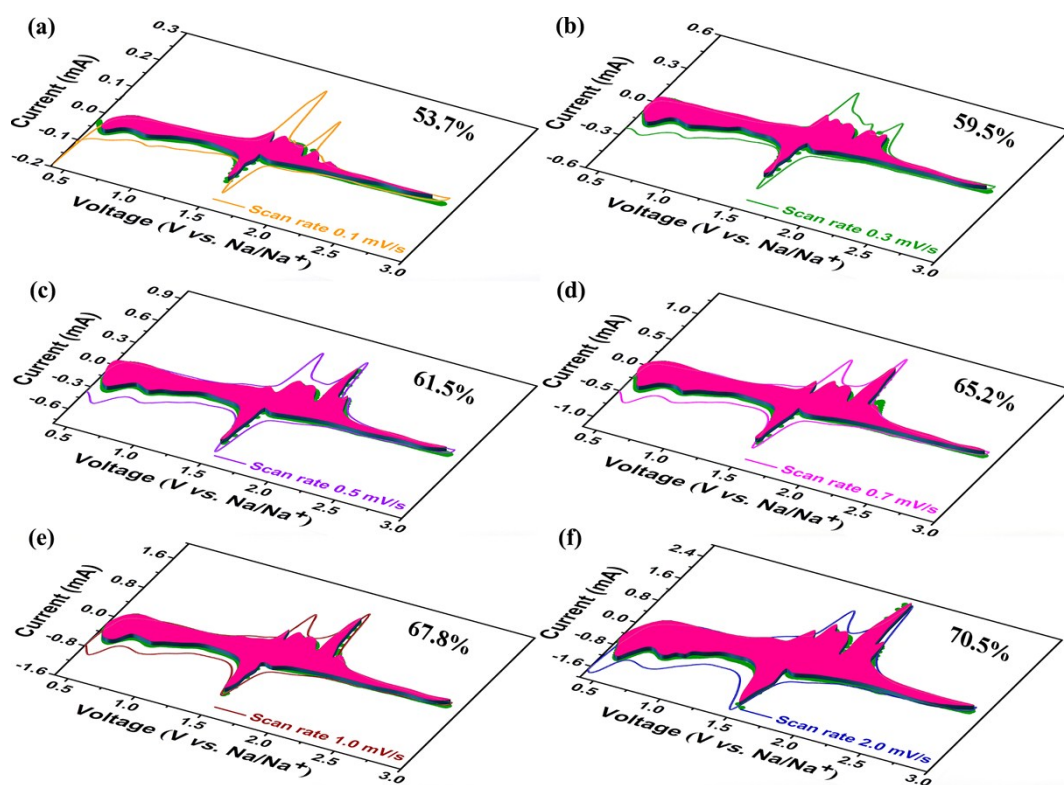

**Fig. S8** CV curves with the pseudocapacitive fraction shown by the red region at various scan rates: (a) scan rate = 0.1 mV/s, (b) scan rate = 0.3 mV/s, (c) scan rate = 0.5 mV/s, (d) scan rate = 0.7 mV/s, (e) scan rate = 1.0 mV/s, (f) scan rate = 2.0 mV/s.

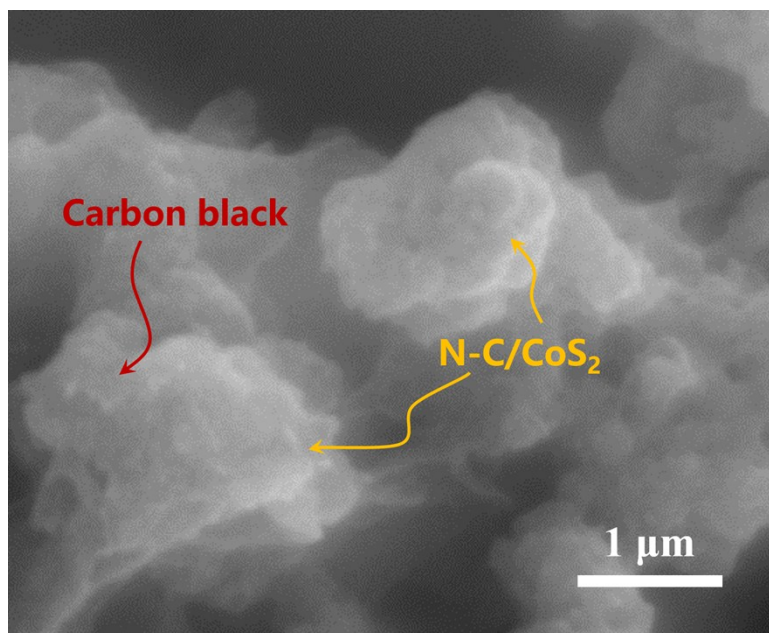

**Fig. S9** SEM image of nanoflower-like N-C/CoS<sub>2</sub> electrode after 50 cycles.
